# Supplementary material for: Abortion Incidence and Service Availability In the United States, 2014
Source: PubMed Central journal article supplement — Perspect Sex Reprod Health. Author manuscript; Available in PMC 2017 Jun 27. (PMC5487028; doi:10.1363/psrh.12015), 2017-01-17
Supplement: NIHMS856316-supplement-Supplemental_file.pdf [file NIHMS856316-supplement-Supplemental_file.pdf]

**APPENDIX TABLE 1. State abortion laws implemented between 2012 and 2014**

| Law                                                                                                                                     | 2012           | 2013                           | 2014       |
|-----------------------------------------------------------------------------------------------------------------------------------------|----------------|--------------------------------|------------|
| Places unnecessary and burdensome regulations on abortion providers (referred to as targeted regulation of abortion providers, or TRAP) | TN             | AL, MI, OH, TX, VA             | AZ, IN, ND |
| Establishes or amends counseling designed to dissuade a woman from obtaining an abortion                                                | AZ, VA         | KS                             | OK         |
| Waiting period extended (48–72 hours)                                                                                                   | UT             | SD                             | AL, MO     |
| Requires patient to make two trips to the abortion provider                                                                             | VA             |                                |            |
| Requires use of ultrasound or fetal heartbeat testing before an abortion                                                                | LA             | IN, OH, WI                     | OK         |
| Requires parental consent before a minor obtains an abortion                                                                            |                | OK                             | AL         |
| Amends the legal process for a minor seeking an abortion without parental involvement                                                   | NH             | OH, OK                         | AL         |
| Prohibits an adult from helping a minor access an abortion without parental consent                                                     |                | AR                             | AZ         |
| Limits access to medication abortion                                                                                                    | OK, SD, WI     | IN, LA, MI, MO, MS, NC, ND, TX |            |
| Limits abortion coverage in private plans                                                                                               | AL, SC, SD, WI | AR, NC, PA                     | GA, IN, MI |
| Allows medical provider to withhold information about a woman’s pregnancy so that she does not seek an abortion                         | AZ, OK         | KS, MT                         |            |
| Amends laws related to the refusal to participate in abortion services                                                                  | KS             | NC                             |            |
| Limits abortion to physicians                                                                                                           | LA, MS, WI     | AL, IN, LA, MO, MS, NC         |            |
| Bans “partial-birth” abortion                                                                                                           |                | NH                             |            |
| Limits abortion after viability                                                                                                         |                |                                | FL         |
| Bans abortion at 20 weeks postfertilization                                                                                             | LA             | AL, AR, ND, TX                 | MS         |
| Limits the use of state employees or facilities for abortion                                                                            | KS             | KS                             |            |

|                                                                                   |                |        |
|-----------------------------------------------------------------------------------|----------------|--------|
| Prohibits abortion for the purpose of gender or race selection or genetic anomaly | KS, NC         | ND, SD |
| Amends laws related to abortion reporting                                         | AR, MS, ND, OK | OK     |

*Note:* Includes only restrictions that were in effect in 2012, 2013 or 2014. Laws that were being challenged in court or that were struck down or temporarily enjoined were excluded.
